# Supplementary material for: Genetic Variants Affect Distinct Metabolic Pathways in Pediatric Multisystem Inflammatory Syndrome and Severe COVID‐19
Source: J Med Virol. 2025 Aug 16;97(8):e70556. doi: 10.1002/jmv.70556 (PMC12357531; doi:10.1002/jmv.70556)
Supplement: Supplementary file 1 — Supplementary Data 1. [file JMV-97-e70556-s003.xlsx]

## Sheet: COVID_GO
ONTOLOGY

## Sheet: COVID_KEGG
category

## Sheet: COVID_REACTOME
ID

## Sheet: MISC_GO
ONTOLOGY

## Sheet: MISC_KEGG
category

## Sheet: MISC_REACTOME
ID
